# Supplementary material
Source: HighWire-hosted journal article supplement (https://rc.rcjournal.com/highwire/filestream/20865/field_highwire_adjunct_files/1/9257suppl2.pdf)

Supplementary Fig 1

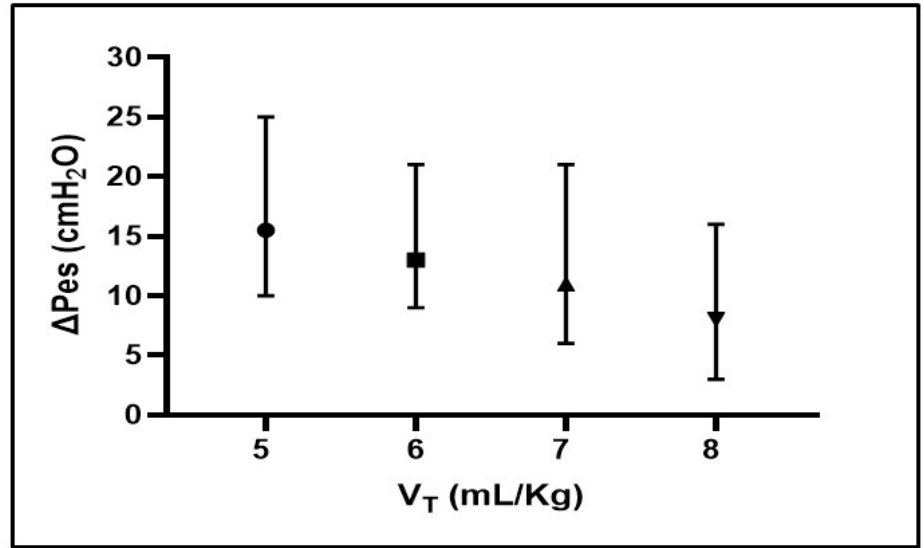

Supplementary Fig 2

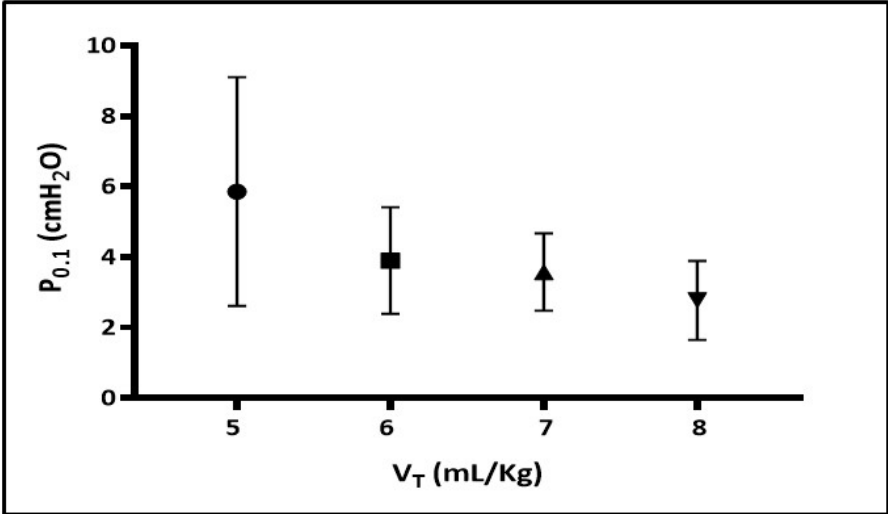

Supplementary Fig 3

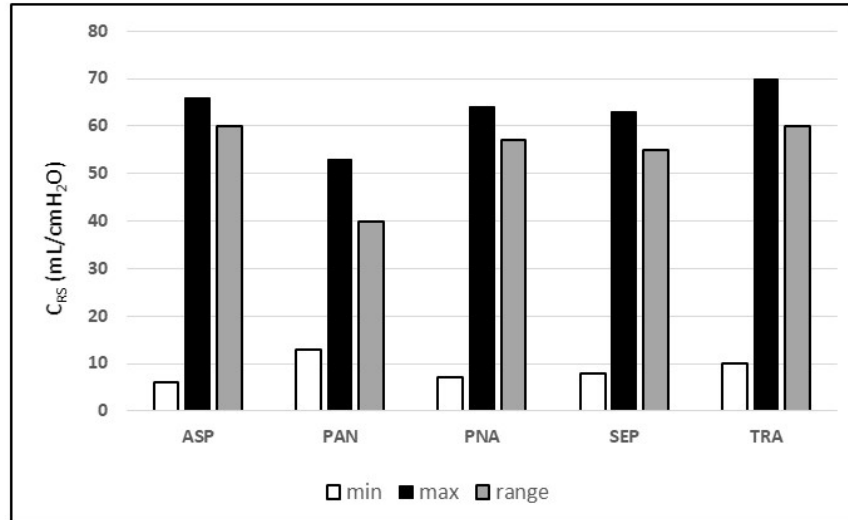

Supplementary Fig 4

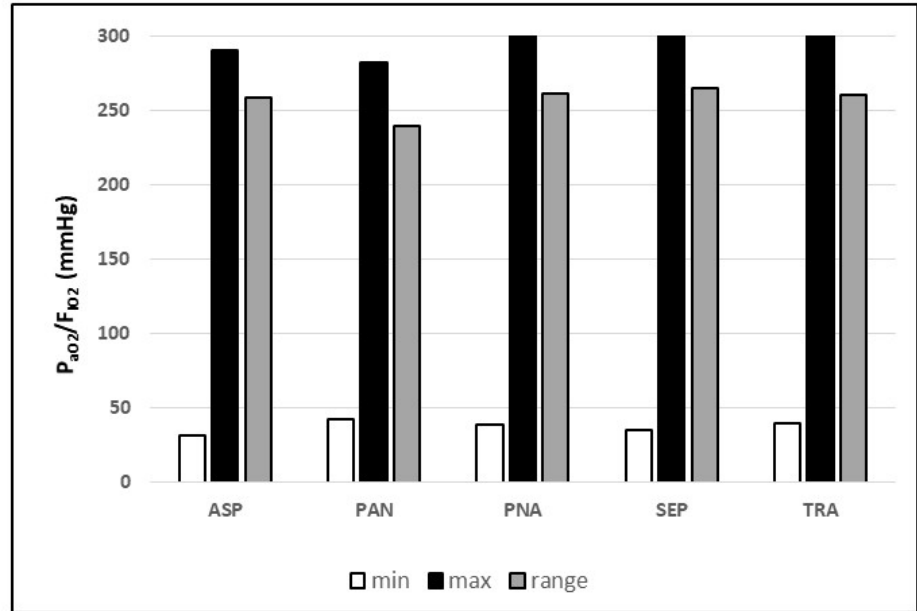

Supplementary Figure 5

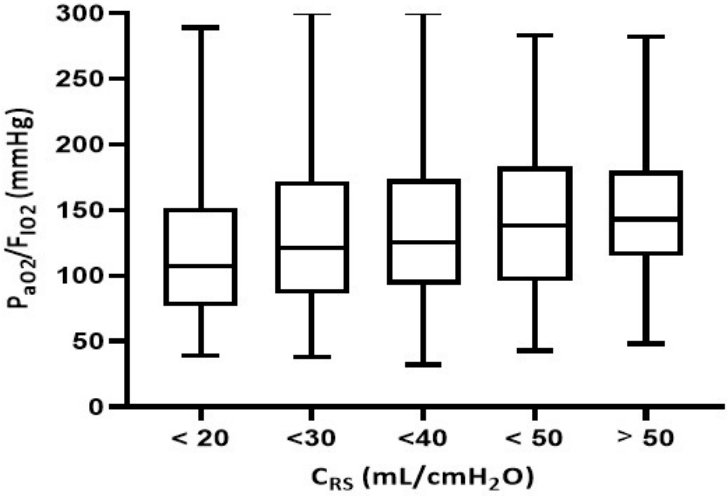

Supplementary Fig 6

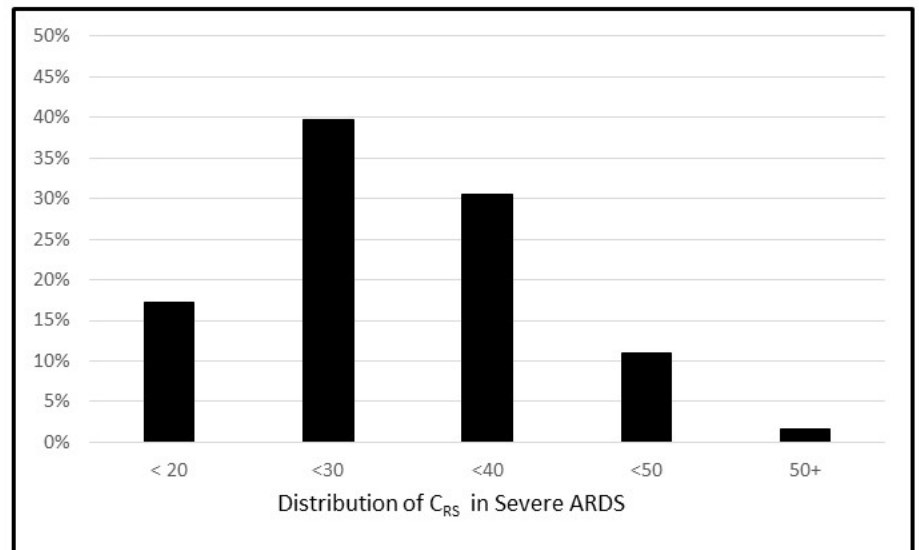

Supplementary Fig 7

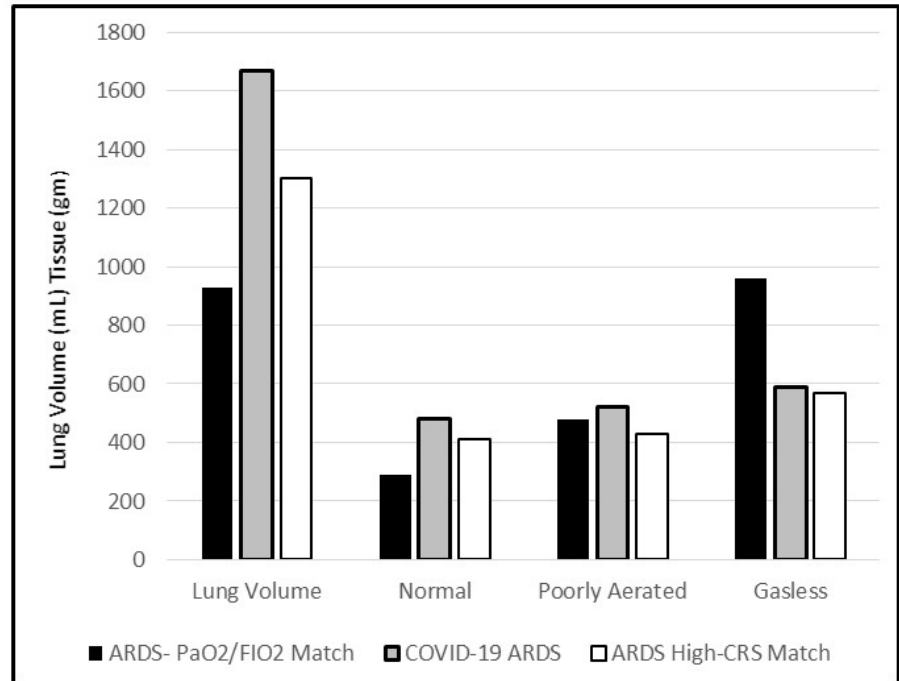

Supplementary Figure 8

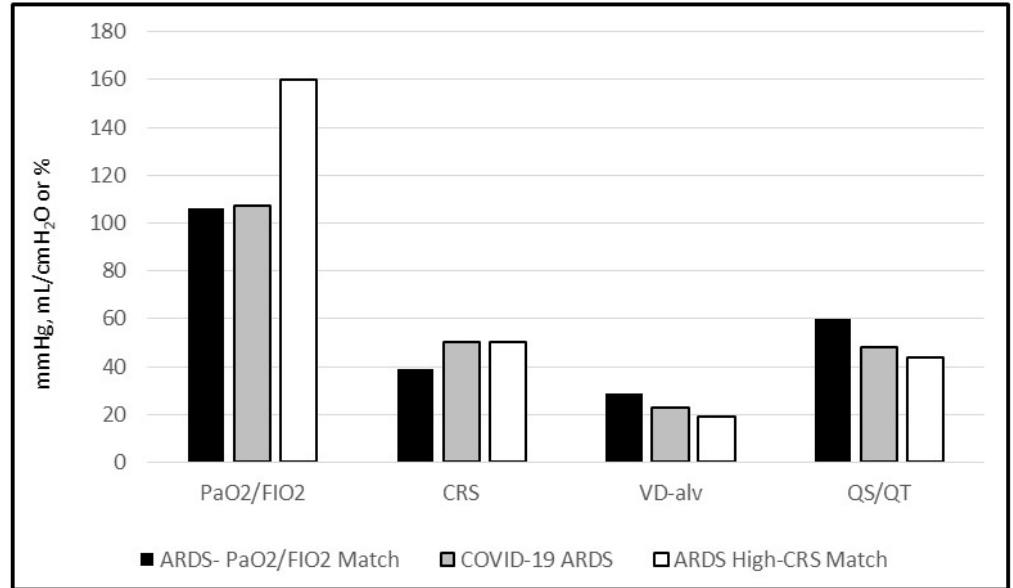

Supplement: 9257suppl2.pdf [file 9257suppl2.pdf]
